# Supplementary material
Source: publisher figshare collection journal article supplement (https://gsajournals.figshare.com/ndownloader/files/13270124)
Supplement: Supplementary file 1 [file 13270124]

| **Table S2 Methylation rates of different genomic structures.** | | | | | |
| --- | --- | --- | --- | --- | --- |
|  |  | C | CG | CHG | CHH |
| HL | 3-UTR | 6.8 | 43.24 | 8.57 | 1.44 |
| 5-UTR | 1.24 | 3.33 | 1.04 | 0.72 |
| CDS | 7.01 | 33.66 | 4.94 | 1.47 |
| Intron | 8.68 | 54.23 | 13.42 | 2.86 |
| ncRNA | 38.47 | 74.18 | 71.55 | 12.32 |
| Transposon | 31.48 | 83.51 | 67.85 | 14.75 |
| Genome | 16.31 | 58.24 | 30.01 | 7.11 |
| LL | 3-UTR | 6.67 | 43.53 | 7.83 | 1.16 |
| 5-UTR | 1.15 | 3.22 | 0.9 | 0.6 |
| CDS | 6.9 | 33.81 | 4.72 | 1.2 |
| Intron | 8.61 | 55.36 | 13.3 | 2.42 |
| ncRNA | 36.3 | 74.21 | 70.18 | 9.29 |
| Transposon | 29.79 | 83.28 | 66.3 | 12.44 |
| Genome | 16.01 | 58.84 | 29.79 | 6.19 |
